# Supplementary material for: Spread of Epidemic MRSA-ST5-IV Clone Encoding PVL as a Major Cause of Community Onset Staphylococcal Infections in Argentinean Children
Source: PubMed Central journal article supplement (PMC3264586; doi:10.1371/journal.pone.0030487), 2012-01-23
Supplement: pone.0030487.s001.pdf [file pone.0030487.s001.pdf]

**Supplemental file S1. Molecular characterization of SCCmec associated with PFGE pattern C and sequence type ST100: Pediatric clone in Argentina <sup>a</sup>**

| Primer sets used for identifying SCCmec  |                   |                            |                                | SCCmec types              |                                          |                          |                             |                                                |
|------------------------------------------|-------------------|----------------------------|--------------------------------|---------------------------|------------------------------------------|--------------------------|-----------------------------|------------------------------------------------|
| Amplified region                         | Primer name       | Primer sequence (5' → 3')  | Reference (Amplicon size, bp)  | IV(2B)/ <sup>b</sup> CA05 | IV(2B&5)/ <sup>b</sup> ZH47 ST100 Zurich | V(5C2)/ <sup>b</sup> WIS | VI(4B)/ <sup>b</sup> HDE288 | IVNv/ <sup>c</sup> PFGE type C ST100 Argentina |
| <i>ccr</i> complex                       |                   |                            |                                |                           |                                          |                          |                             |                                                |
| <i>ccrA2</i>                             | β2                | ATTGCCTTGATAATAGCCITCT     | 32                             | +                         | +                                        | -                        | -                           | +                                              |
|                                          | α2                | TAAAGGCATCAATGCACAAACACT   | (1000)                         |                           |                                          |                          |                             |                                                |
| <i>ccrB2</i>                             | <i>ccrB2F2 F2</i> | AGTTTCTCAGAATTGCAACG       | 31                             | +                         | +                                        | -                        | -                           | +                                              |
|                                          | <i>ccrB2F2 R2</i> | CCGATATAGAAWGGGTTAGC       | (311)                          |                           |                                          |                          |                             |                                                |
| <i>ccrAB4</i>                            | <i>ccrAB4 F1</i>  | TCA TCA ATA AGT ATG GAA CG | 34                             | -                         | -                                        | -                        | +                           | -                                              |
|                                          | <i>ccrAB4 R1</i>  | TTT CTT GCG ACT CTC TTG G  | (1549)                         |                           |                                          |                          |                             |                                                |
| <i>ccrC</i>                              | <i>ccrC F2</i>    | GTAICTCGTTACAATGTTTGG      | 31                             | -                         | +                                        | +                        | -                           | -                                              |
|                                          | <i>ccrC R2</i>    | ATAATGGCTTCATGCTTACC       | (449)                          |                           |                                          |                          |                             |                                                |
| Class B <i>mec</i> complex               |                   |                            |                                | +                         | -                                        | -                        | +                           | -                                              |
| IS 1272                                  | IS5               | AACGCCACTCATAACATATGGAA    | 32                             | +                         | -                                        | -                        | +                           | -                                              |
|                                          | mA6               | TATACCAAACCCGACAAC         | (2000)                         |                           |                                          |                          |                             |                                                |
| ψIS 1272 and <i>mecR1</i>                | ISF1              | AATTGAAGCAAATGCCAATCG      | 34                             | +                         | -                                        | -                        | +                           | -                                              |
|                                          | MRP1              | CAACTGTCGTAGTCGAAACC       | (1903)                         |                           |                                          |                          |                             |                                                |
| Class B2 <i>mec</i> complex <sup>d</sup> |                   |                            |                                | -                         | +                                        | -                        | -                           | +                                              |
| Tn4001-1 [IS1256L-aac(2)-aph(6'')] ]     | Tn4001-1-F        | GCCAATCGCTTAATTGGAGCCG     | This study <sup>d</sup> (709)  | -                         | +                                        | -                        | -                           | +                                              |
|                                          | Tn4001-1-R        | ACTTCATCTTCCCAAGGCTCTGT    |                                |                           |                                          |                          |                             |                                                |
| Tn4001-2 (IS256R-IS 1272)                | Tn4001-2-F        | TGGCCATCACGTGTTCTGGG       | This study <sup>d</sup> (968)  | -                         | +                                        | -                        | -                           | +                                              |
|                                          | Tn4001-2-R        | TCGGATGTCTGTCCGAGGACT      |                                |                           |                                          |                          |                             |                                                |
| Tn4001-3 ( <i>mecA</i> -IS256L)          | Tn4001-3-F        | ACCAAACCCGACAACACTACAATAT  | This study <sup>d</sup> (1298) | -                         | +                                        | -                        | -                           | +                                              |
|                                          | Tn4001-3-R        | GTGTCGTAAAGCTGCGCTCA       |                                |                           |                                          |                          |                             |                                                |
| J3 region                                |                   |                            |                                |                           |                                          |                          |                             |                                                |
| <i>dcs</i>                               | <i>dcs-F2</i>     | CATCCTATGATAGCTTGGTC       | 31                             | +                         | -                                        | -                        | +                           | +                                              |
|                                          | <i>dcs-R1</i>     | CTAATCATAGCCATGACCG        | (342)                          |                           |                                          |                          |                             |                                                |
| J1 region                                |                   |                            |                                |                           |                                          |                          |                             |                                                |
| SCCmec V                                 | SCCmecV-J1-F      | TTCTCCATTCTTGTTCATCC       | 31 (377)                       | -                         | -                                        | +                        | -                           | -                                              |
|                                          | SCCmecV-J1-R      | AGAGACTACTGACTTAAGTGG      |                                |                           |                                          |                          |                             |                                                |
| SCCmec IV <sup>e</sup>                   |                   |                            |                                |                           |                                          |                          |                             |                                                |
| IVa                                      | J IVa F           | ATAAGAGATCGAACAGAAGC       | 33                             | +                         | -                                        | -                        | -                           | -                                              |
|                                          | J IVa R           | TGAAGAAATCATGCCTATCG       | (278)                          |                           |                                          |                          |                             |                                                |
| IVc                                      | J IVc F           | CCATTGCAAATTTCTCTTCC       | 33                             | -                         | +                                        | -                        | -                           | +                                              |
|                                          | J IVc R           | ATAGATTCTACTGCAAGTCC       | (483)                          |                           |                                          |                          |                             |                                                |

<sup>a</sup> SCCmec: Staphylococcal Cassette Chromosome *mec*; PFGE: Pulsed field gel electrophoresis;

<sup>b</sup> SCCmec type/strain name: SCCmec type associated with strain control.

<sup>c</sup> SCCmec IVNv: new variant of SCCmec type IV associated with Pediatric clone (pulsotype C-ST100) in Argentina [15,33,34].

<sup>d</sup> Primers designed based on the previously determined sequence of strain ZH47 accession number AM292304 [32]. Amplicons with the expected size were end sequenced, obtaining 100% of homology with the ZH47 strain genome sequence.

<sup>e</sup> The *SCCmec* IV subtypes IVb, IVd, IVg, IVh also were assayed by PCR [30], only positive ones are shown.
